# Supplementary material for: Visible and near-infrared chemosensor for colorimetric and ratiometric detection of cyanide
Source: Royal Society of Chemistry journal article supplement (doi:10.1039/b813478b), 2008-12-05
Supplement: b813478b.pdf [file b813478b.pdf]

# Supporting Information

## Visible and Near-Infrared Chemosensor for Colorimetric and Ratiometric Detection of Cyanide

Gang Qian,<sup>a,b</sup> Xianzhen Li,<sup>c</sup> and Zhi Yuan Wang<sup>\*a,c</sup>

<sup>a</sup> State Key Laboratory of Polymer Physics and Chemistry, Changchun Institute of Applied Chemistry, Chinese Academy of Sciences, <sup>b</sup> Graduate School of Chinese Academy of Sciences, Changchun 130022, China, and <sup>c</sup> Department of Chemistry, Carleton University, 1125 Colonel By Drive, Ottawa, Ontario, Canada K1S 5B6

\* To whom all the correspondence should be addressed. E-mail: wayne\_wang@carleton.ca

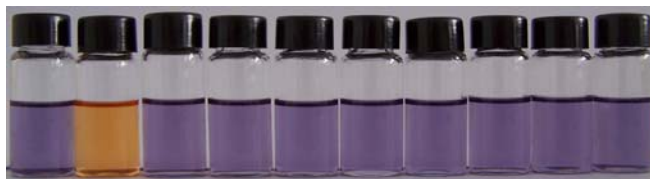

**Figure S1.** Color changes of **2** ( $20\ \mu\text{M}$  in  $\text{DMF}/\text{H}_2\text{O} = 99/1\ \text{v/v}$ ) in the presence of 5.0 molequiv. of anions after 1 hour at  $60\ ^\circ\text{C}$ . From left: no anion,  $\text{CN}^-$ ,  $\text{F}^-$ ,  $\text{AcO}^-$ ,  $\text{H}_2\text{PO}_4^-$ ,  $\text{Cl}^-$ ,  $\text{Br}^-$ ,  $\text{I}^-$ ,  $\text{NO}_3^-$  and  $\text{HSO}_4^-$ .

(a)

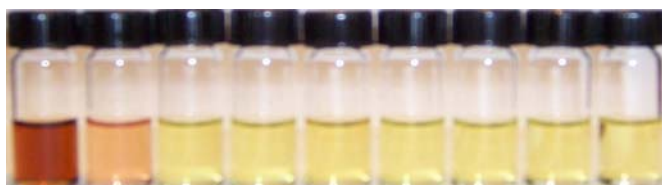

(b)

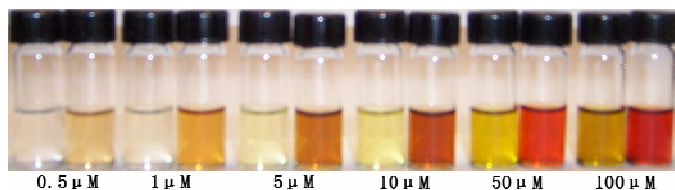

**Figure S2.** (a) Color changes of **3** ( $10\ \mu\text{M}$ ) in  $\text{DMF}/\text{H}_2\text{O}$  solution ( $99/1\ \text{v/v}$ ) in the presence of 2 equivalents of anions. From left:  $\text{CN}^-$ ,  $\text{F}^-$ ,  $\text{Cl}^-$ ,  $\text{Br}^-$ ,  $\text{I}^-$ ,  $\text{H}_2\text{PO}_4^-$ ,  $\text{HSO}_4^-$ ,  $\text{NO}_3^-$ , and no anion. (b) Color contrast of **3** in  $\text{DMF}/\text{H}_2\text{O}$  solution ( $99/1\ \text{v/v}$ ) in the presence of 2 equivalents of  $\text{CN}^-$  ( $0.5\ \mu\text{M}$ ,  $1\ \mu\text{M}$ ,  $5\ \mu\text{M}$ ,  $10\ \mu\text{M}$ ,  $50\ \mu\text{M}$  and  $100\ \mu\text{M}$ ). Left is the blank solution of **3**.

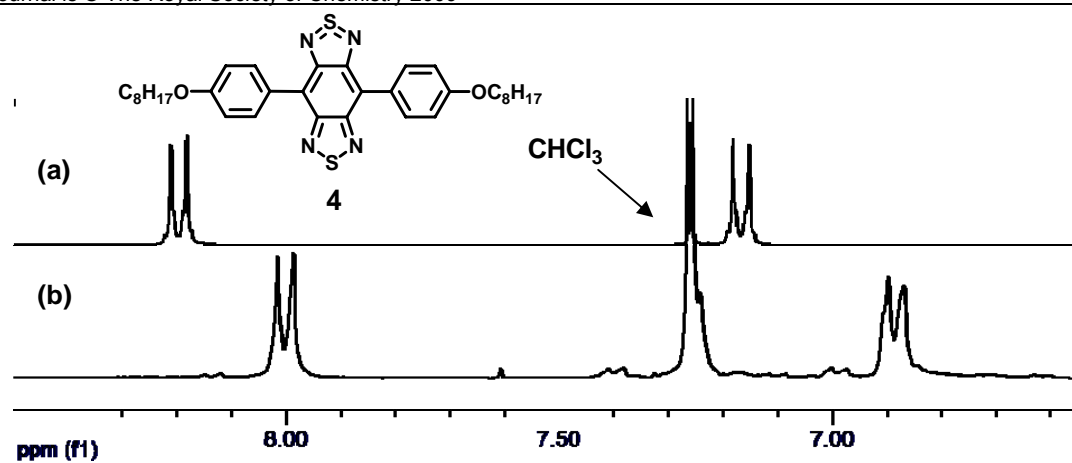

**Figure S3.** Partial <sup>1</sup>H NMR spectral change (300 MHz, 10 mM, CDCl<sub>3</sub>, 25 °C) of model compound **4**: (a) before and (b) after addition of 4 molequiv. of tetrabutylammonium cyanide.

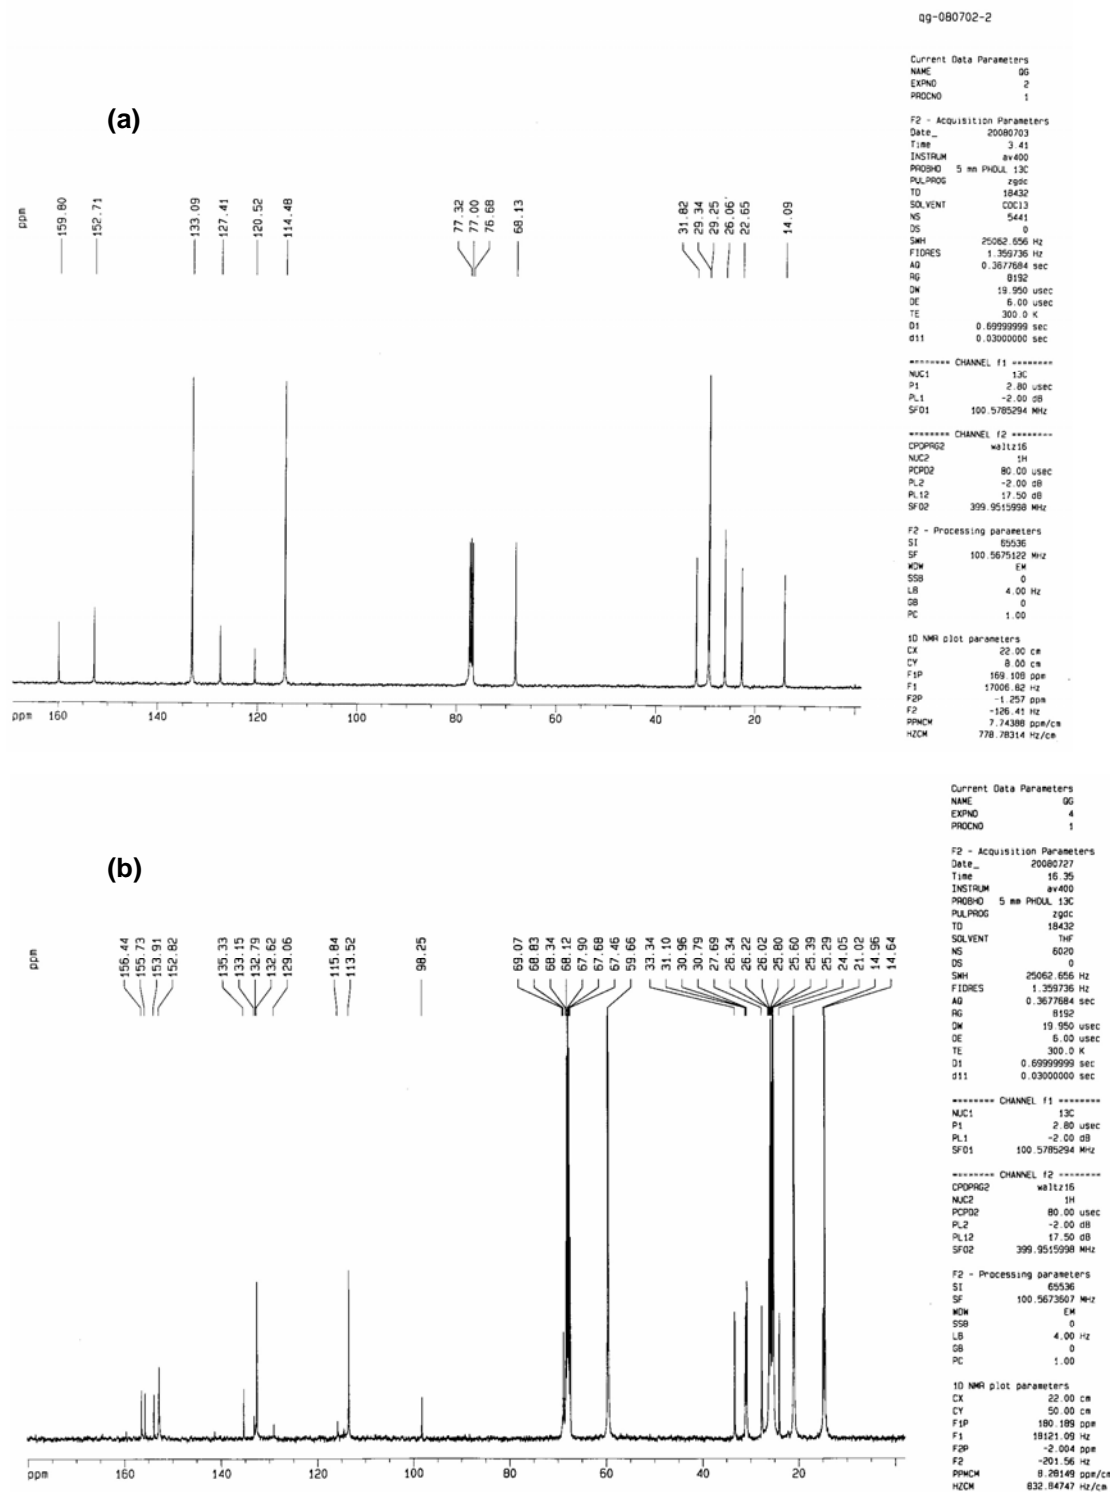

**Figure S4.**  $^{13}\text{C}$  NMR spectral change (100 MHz, a:  $\text{CDCl}_3$ , b:  $d_8$ -THF, 25 °C) of model compound **4** (a) before and (b) after addition of 4 molequiv. of tetrabutylammonium cyanide.

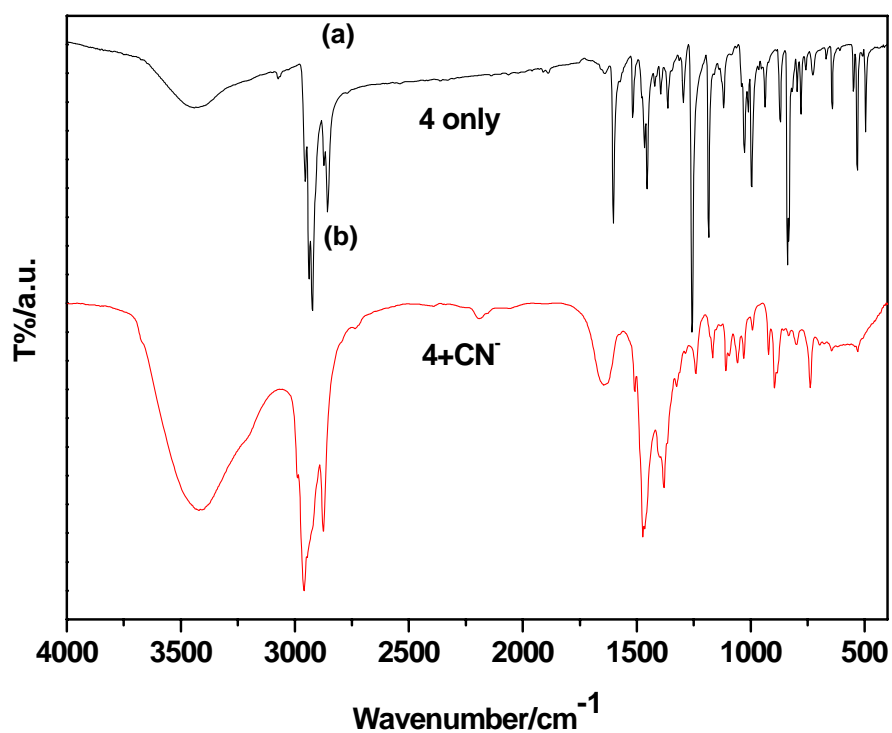

**Figure S5.** FTIR spectral change of model compound **4** (a) before and (b) after addition of 4 molequiv. of tetrabutylammonium cyanide.
